# Supplementary material for: Multigenome DNA sequence conservation identifies Hox cis-regulatory elements
Source: HighWire-hosted journal article supplement (doi:10.1101/gr.085472.108), 2008-11-03

**S1**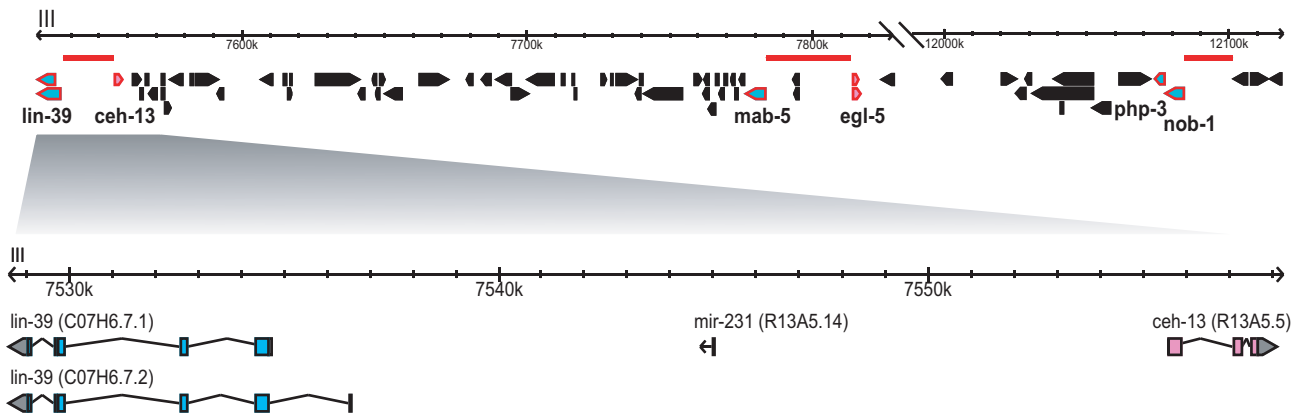

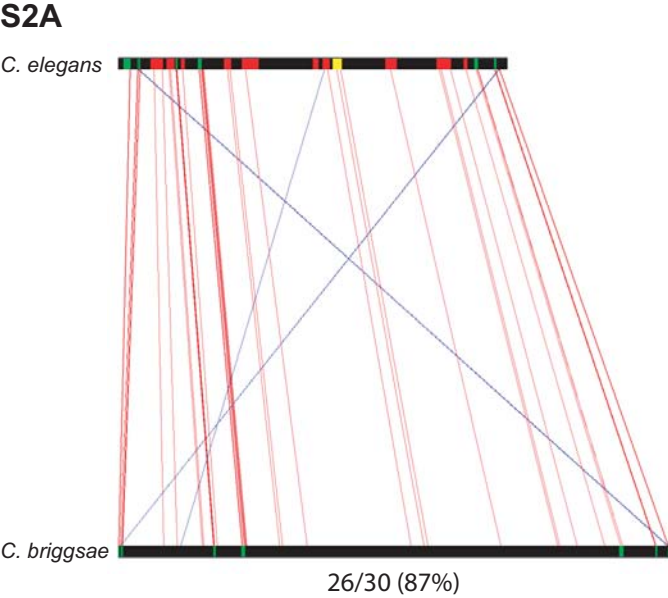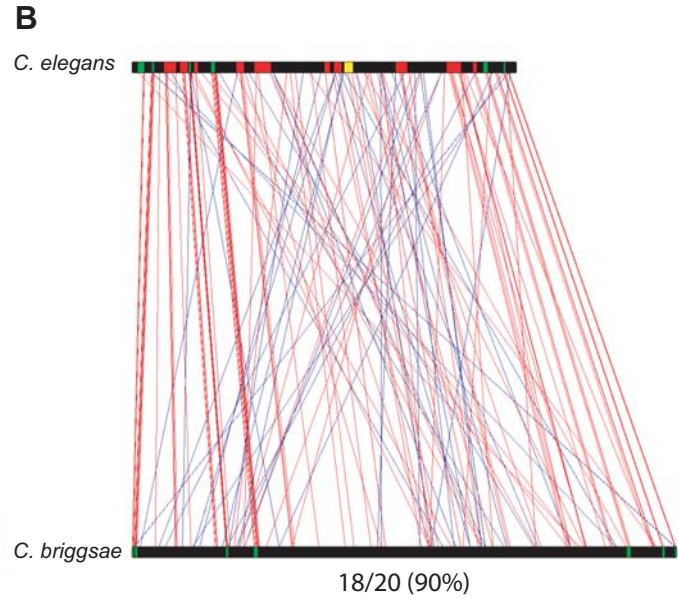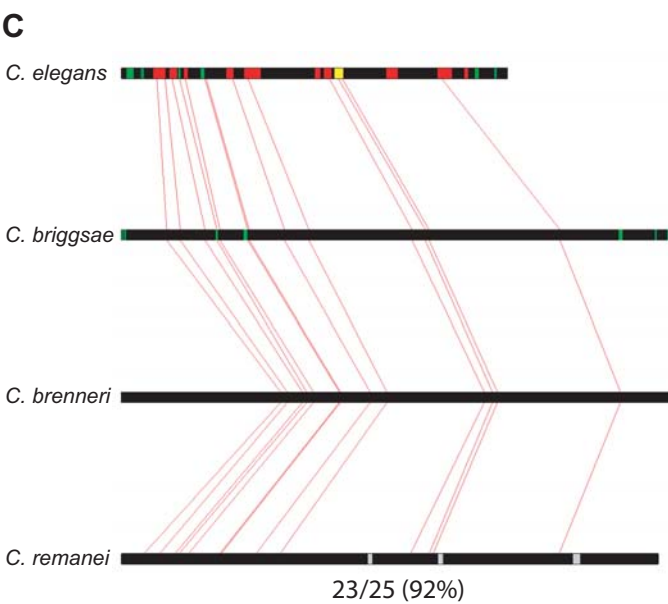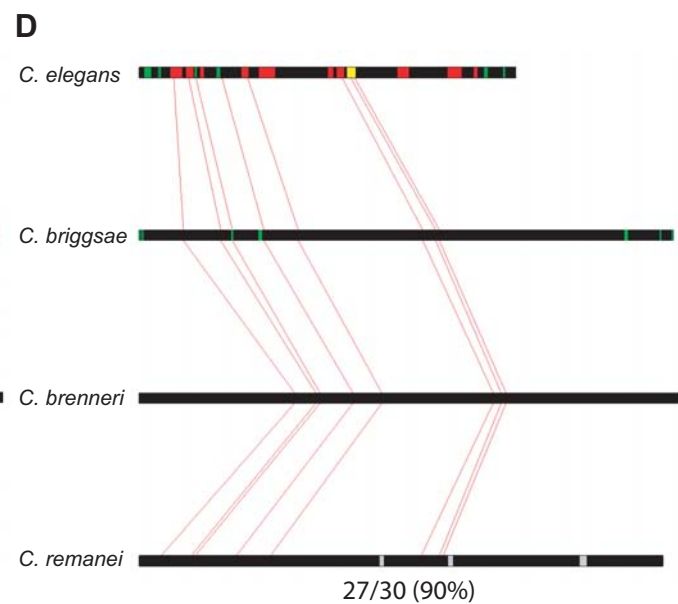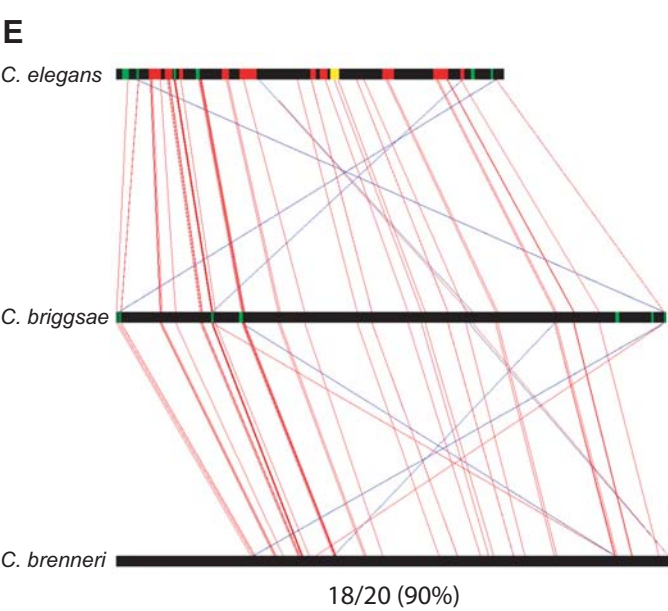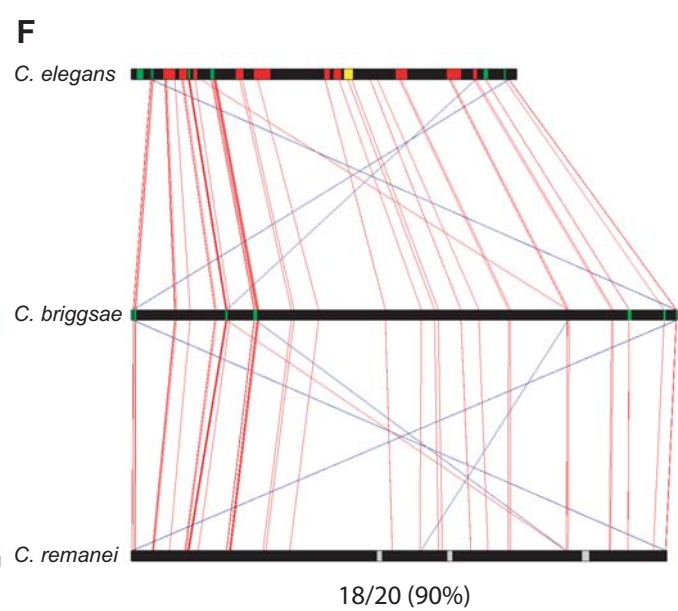

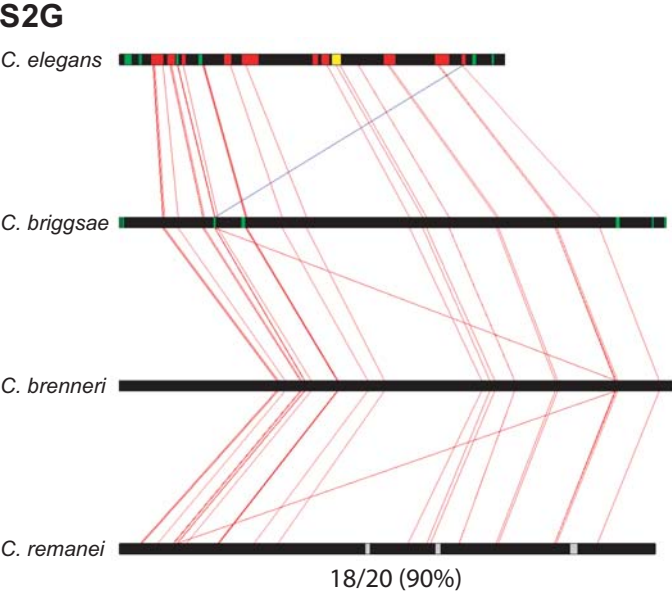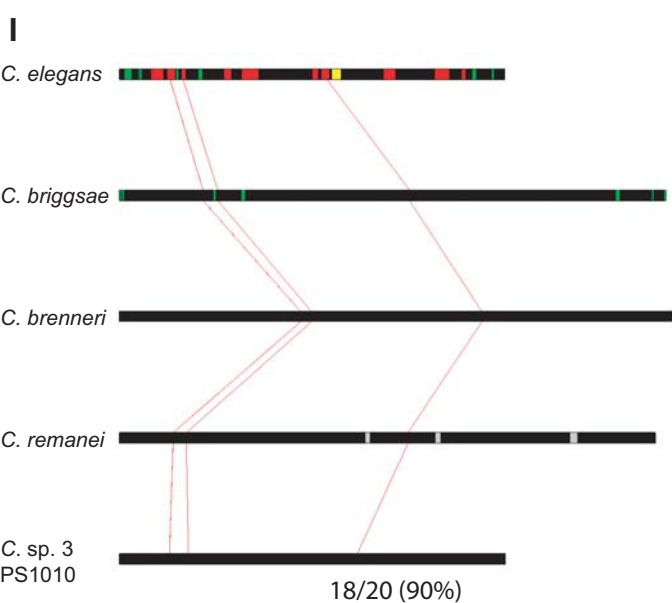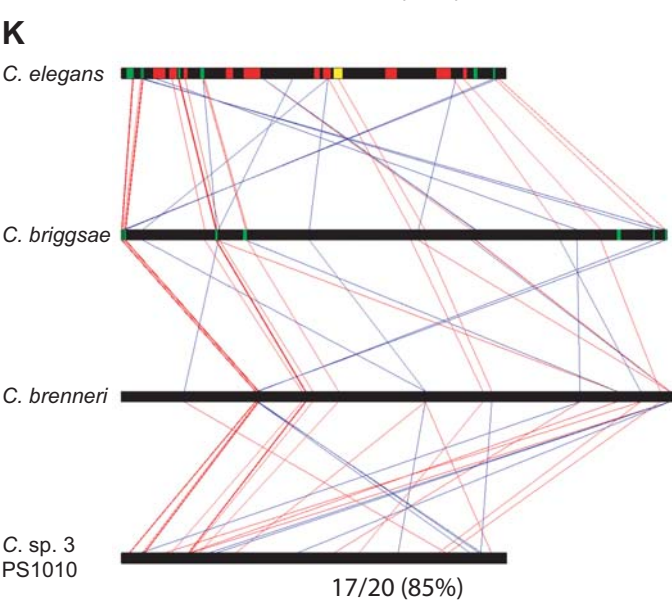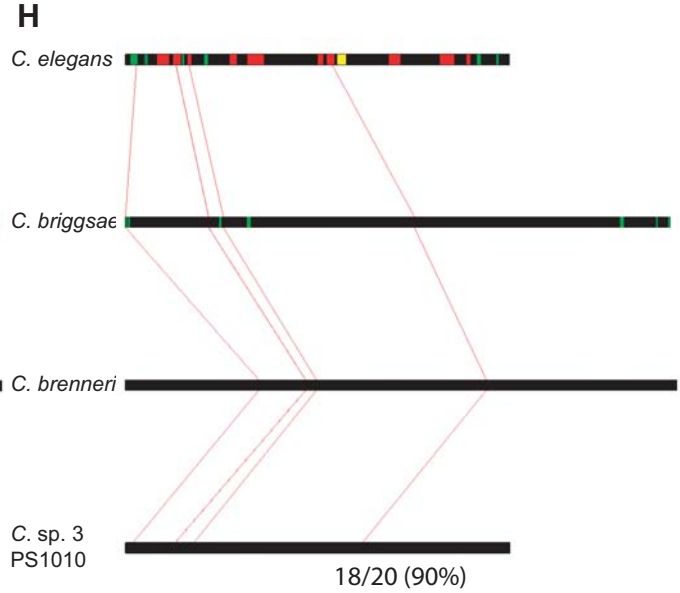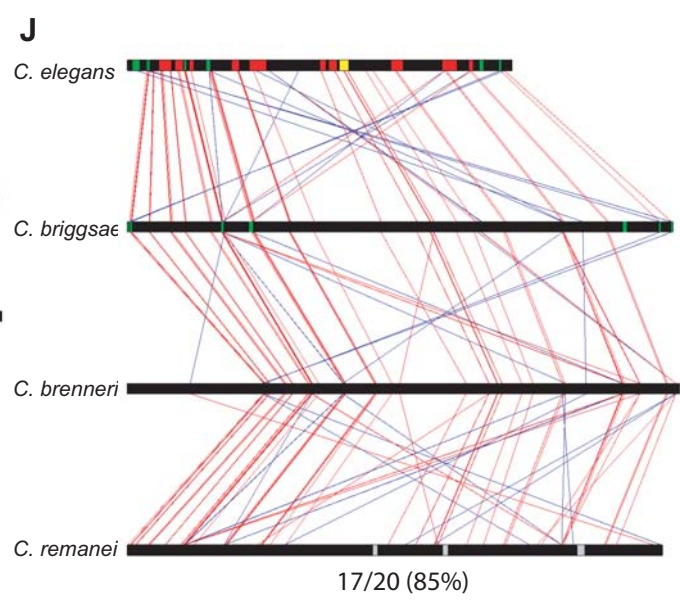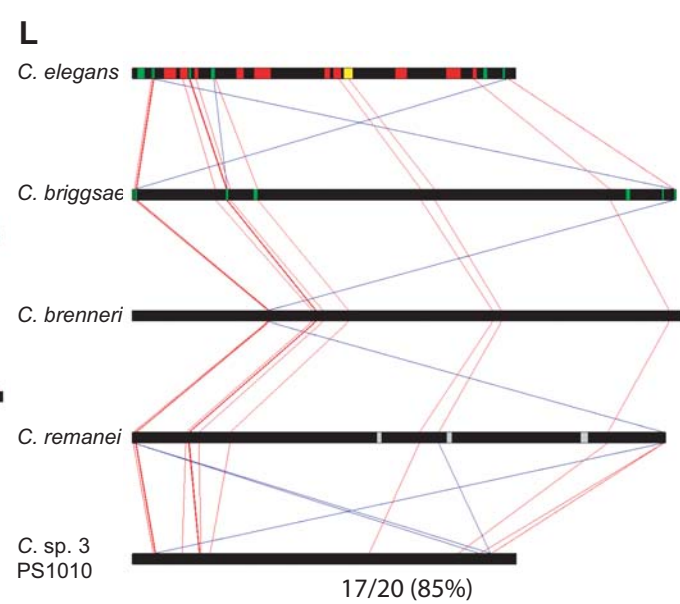

**S3A**

*C. elegans* AAGATTTAATGGCACCCATAAAATCTCAACT  
*C. briggsae* GAGTTTTAATGGCACCCATAAAATCTCAACT  
*C. brenneri* AAGAGTTAATGGCACCCATAAAATCTCAACT  
*C. remanei* AAGAGTTAATGGCACCCATAAAATCTCAACT  
Human GATTGTTTATTACAGCCATAAAATCTTGCAG  
Dog GATTGTTTATTACAGCCATAAAATCTTGCAG  
Mouse GATTGTTTATTACAGCCATAAAATCTTGCAG  
Opossum GGTGTTTATTACAGCCATAAAATCTCGCTC  
Platypus GATTGTTTATTACAGCCATAAAATCTTGCAG  
Frog AAGCGTATATTTCCACCCATAAAAACCAACC

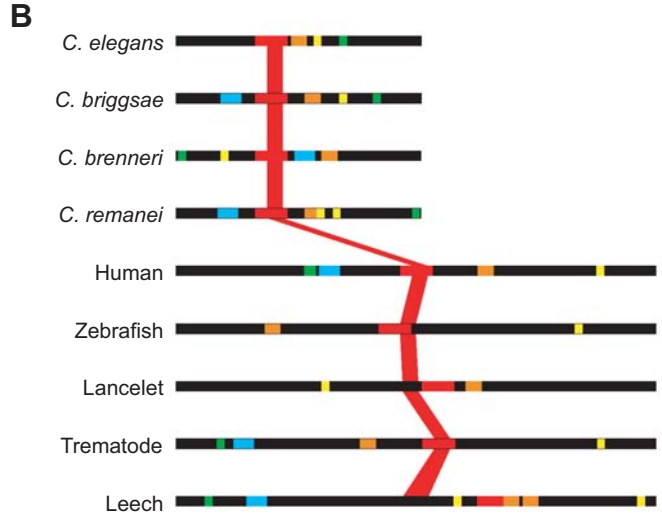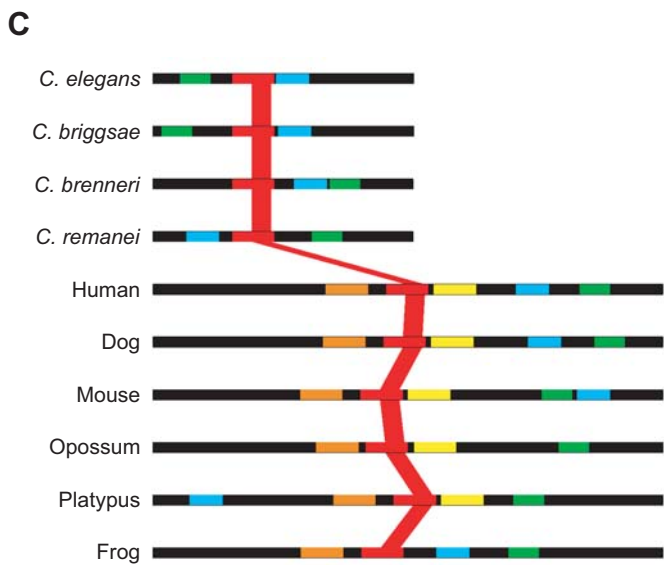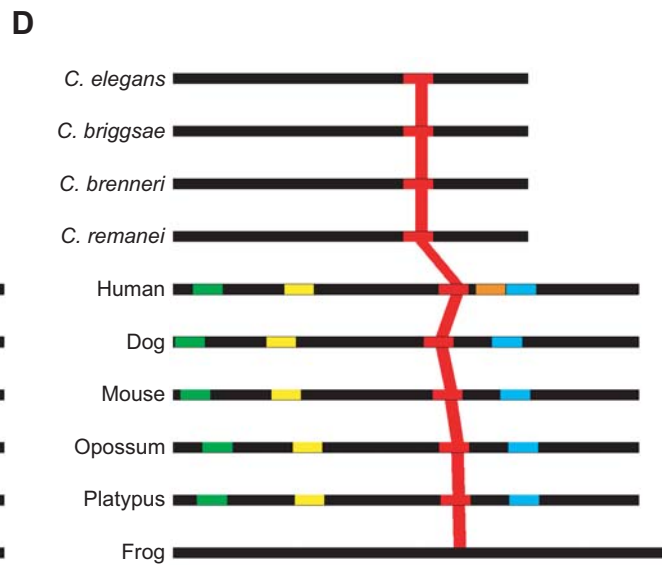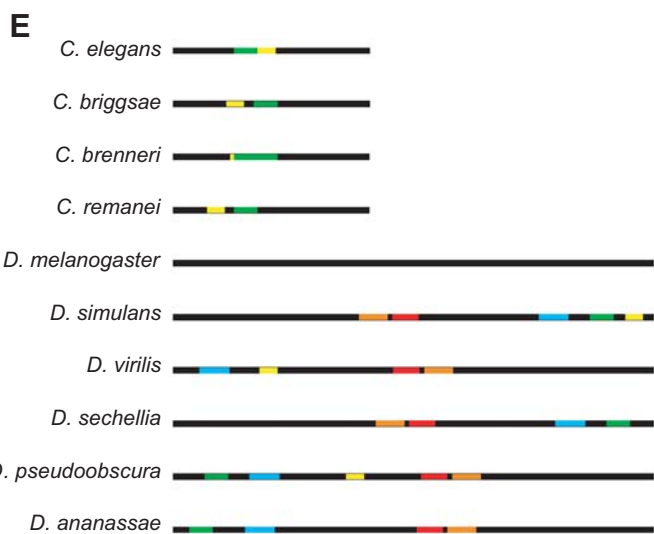



S4A

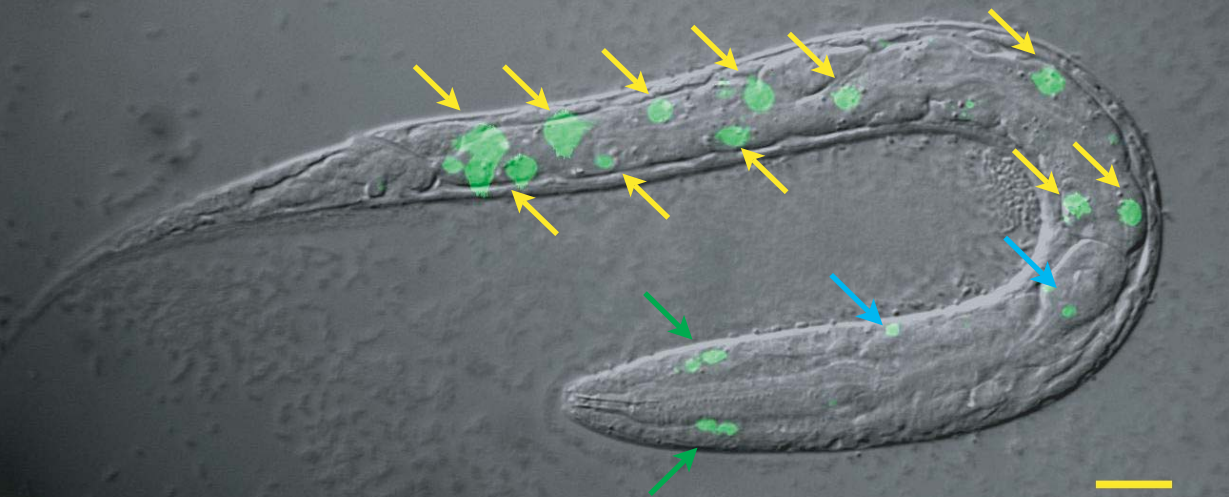

Mouse N7 (background)

B

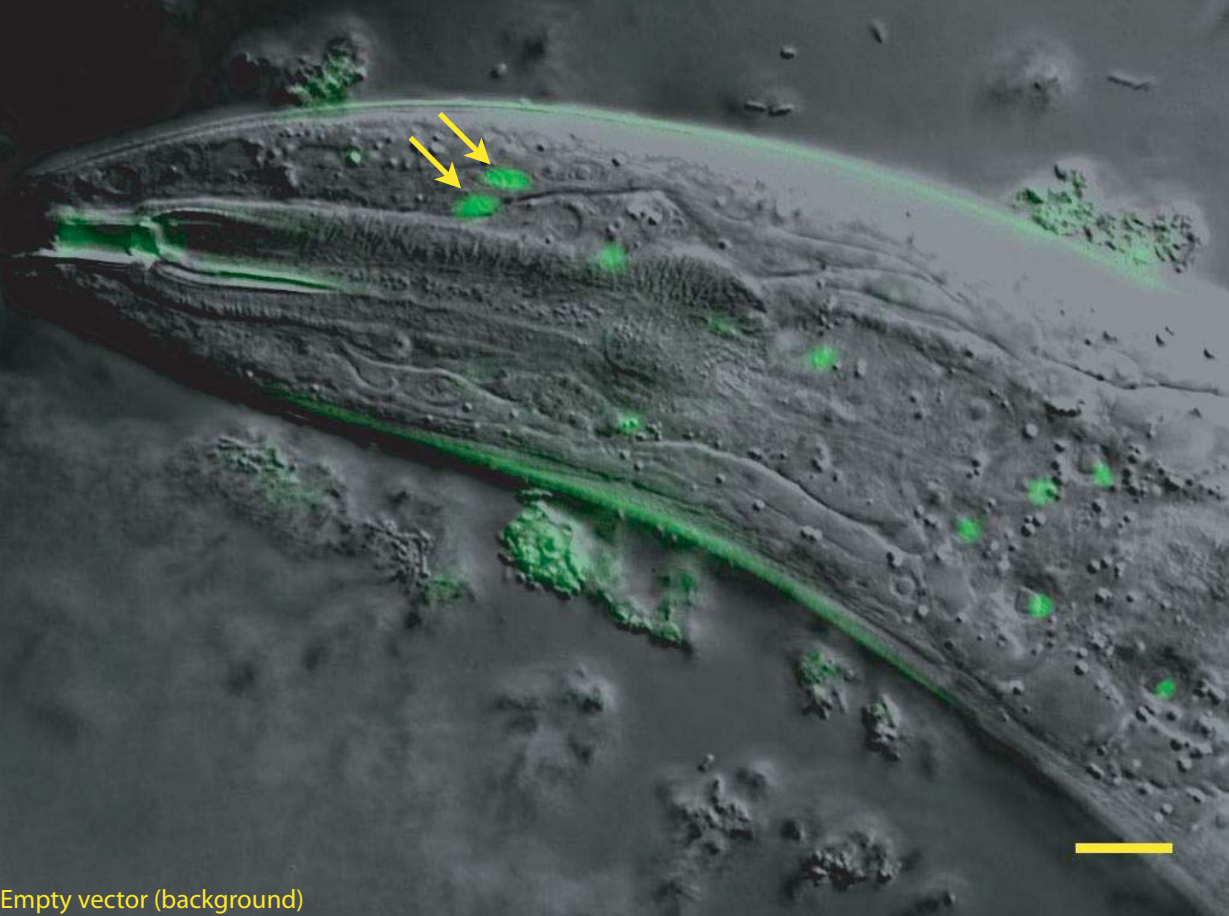

Empty vector (background)

**S5A**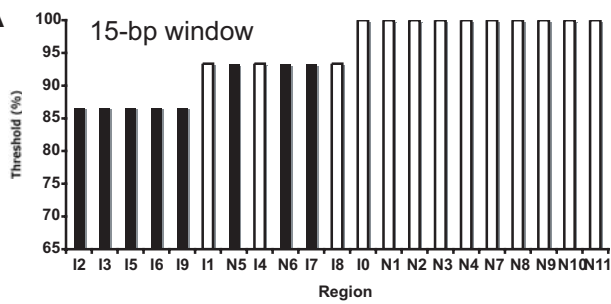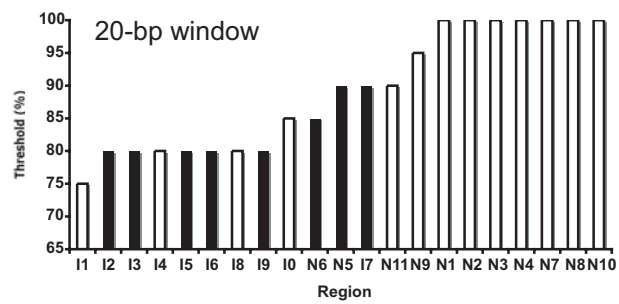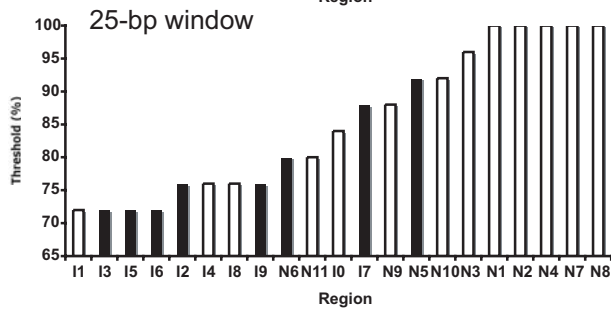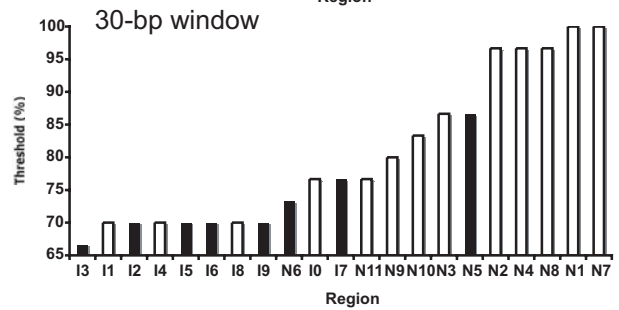**B**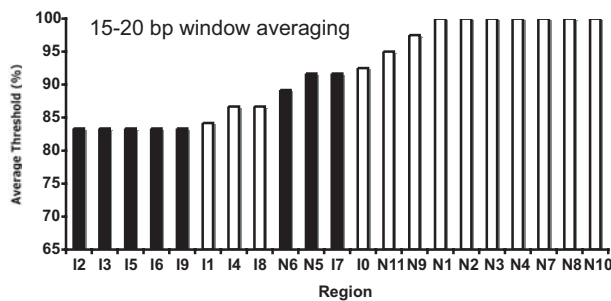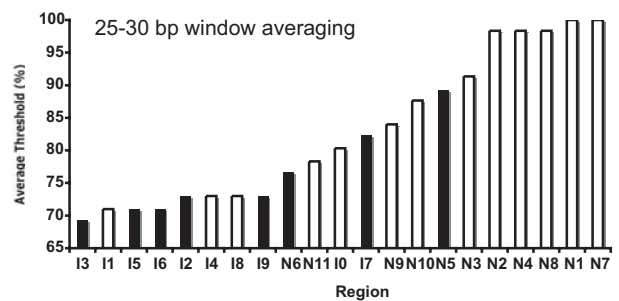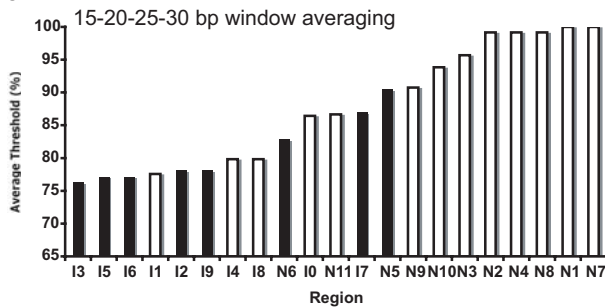**C**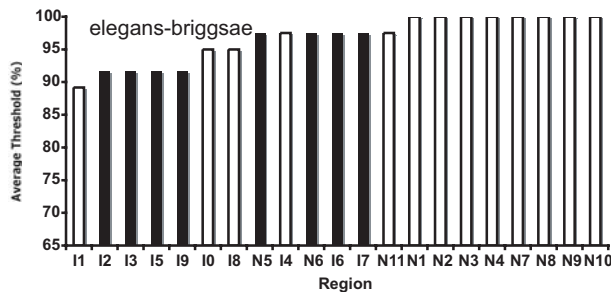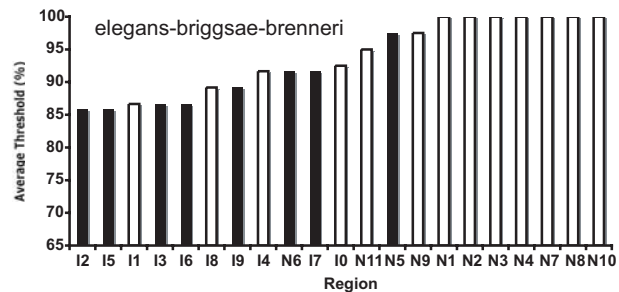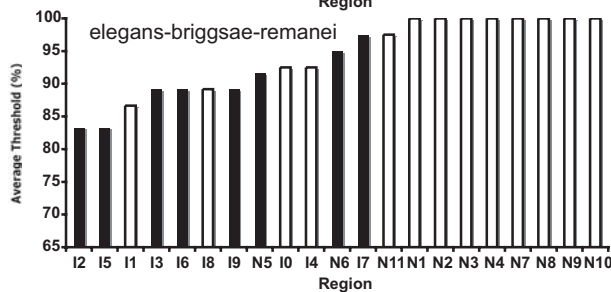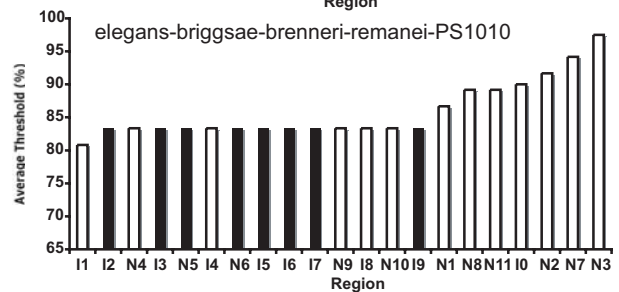

**S5D**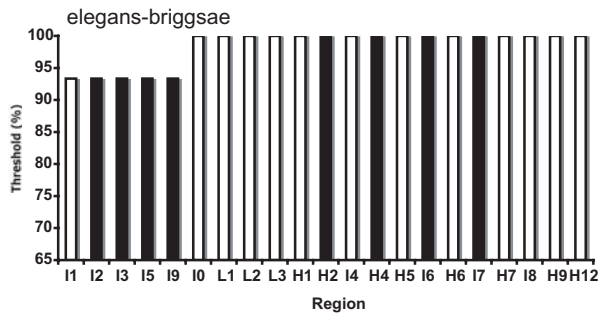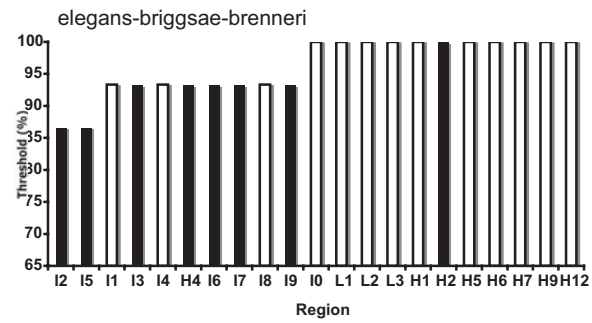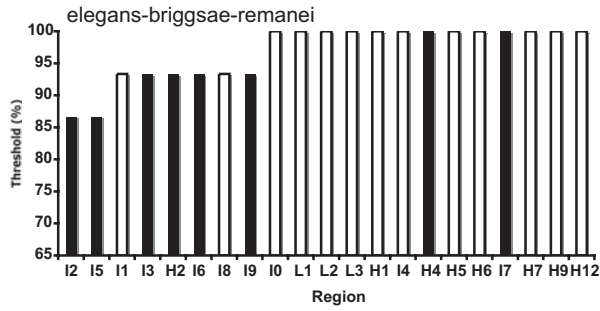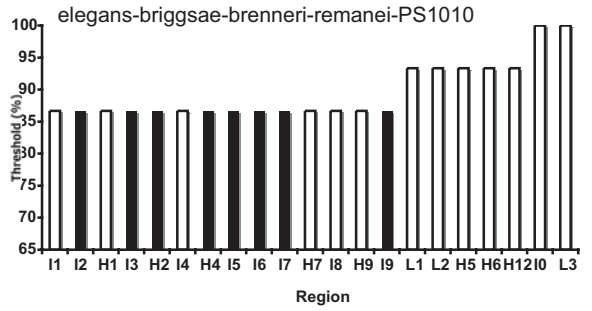**E**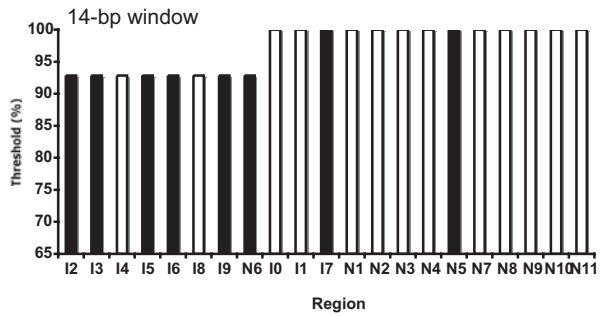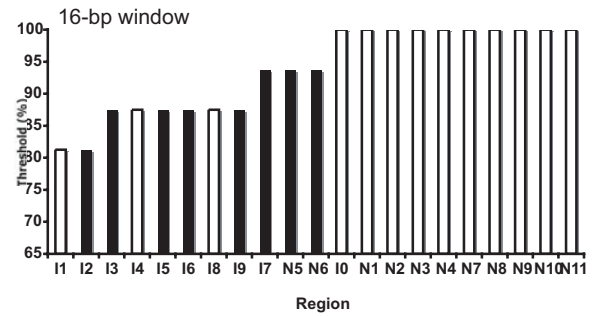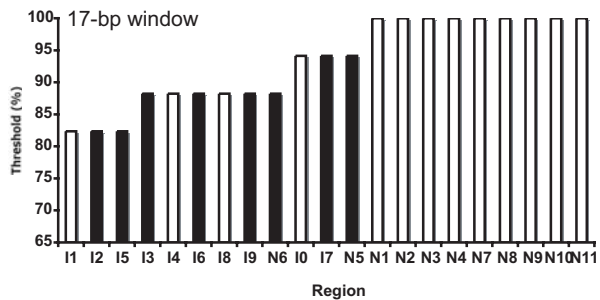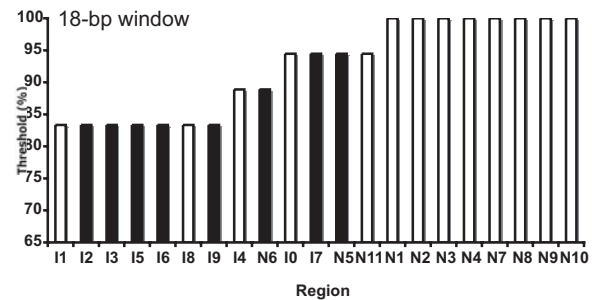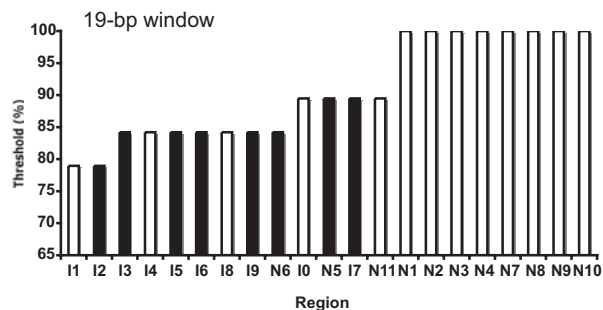

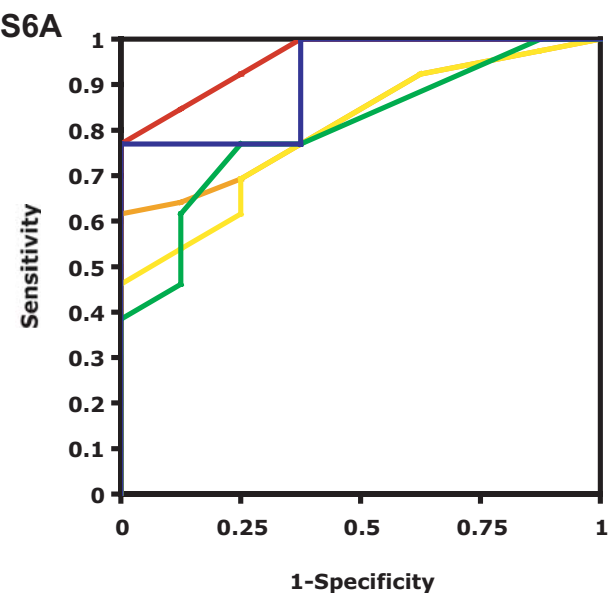

15 bp window ■  
 20 bp window ■  
 25 bp window ■  
 30 bp window ■  
 15-20 bp window averaging ■

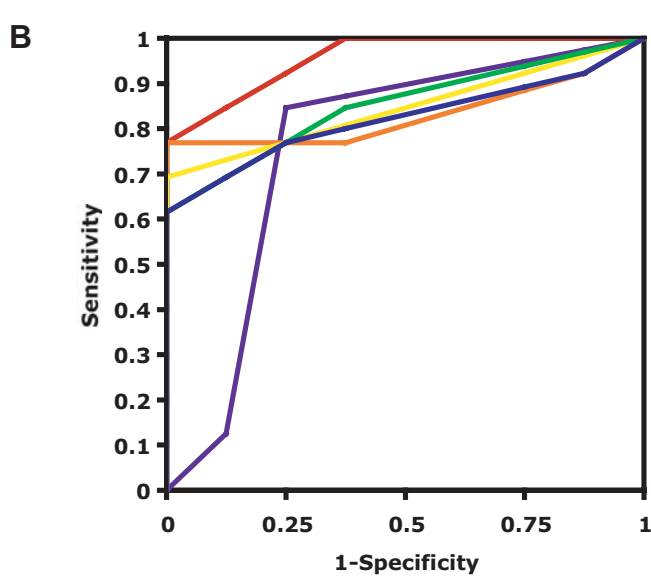

15 bp window ■  
 16 bp window ■  
 17 bp window ■  
 18 bp window ■  
 19 bp window ■  
 14 bp window ■

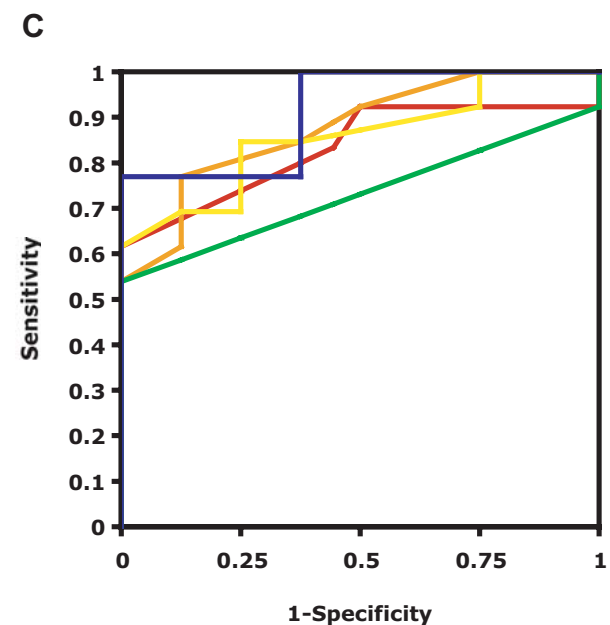

*elegans-briggsae* ■  
*elegans-briggsae-brenneri* ■  
*elegans-briggsae-remanei* ■  
*elegans-briggsae-brenneri-remanei* ■  
*elegans-briggsae-brenneri-remanei-PS1010* ■

15-20 bp window averaging

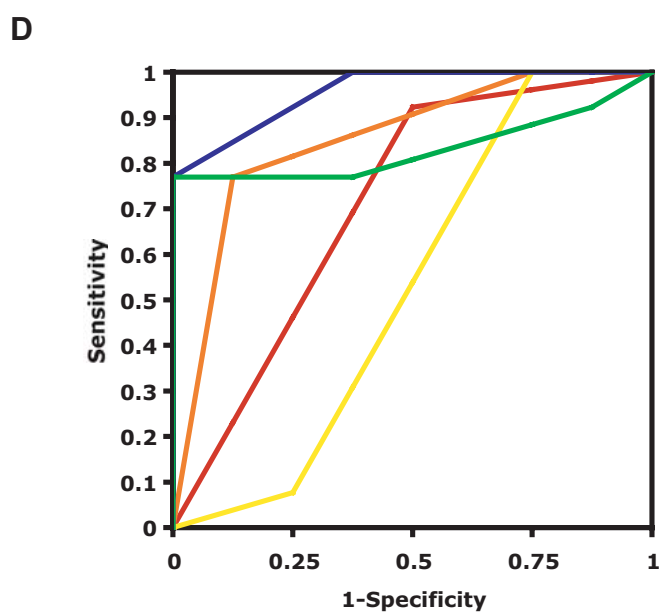

*elegans-briggsae* ■  
*elegans-briggsae-brenneri* ■  
*elegans-briggsae-remanei* ■  
*elegans-briggsae-brenneri-remanei* ■  
*elegans-briggsae-brenneri-remanei-PS1010* ■

15 bp window



# S6E

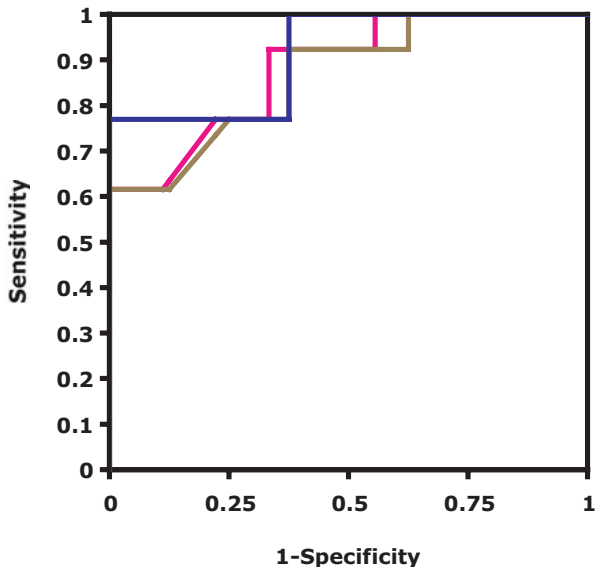

15-20-25-30 bp window averaging

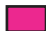

15-20 bp window averaging

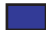

25-30 bp window averaging

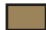

**S7A***unc-54**C. elegans**C. briggsae**C. brenneri**C. remanei***B***myo-2**C. elegans**C. briggsae**C. brenneri**C. remanei***C***myo-3**C. elegans**C. briggsae**C. brenneri**C. remanei*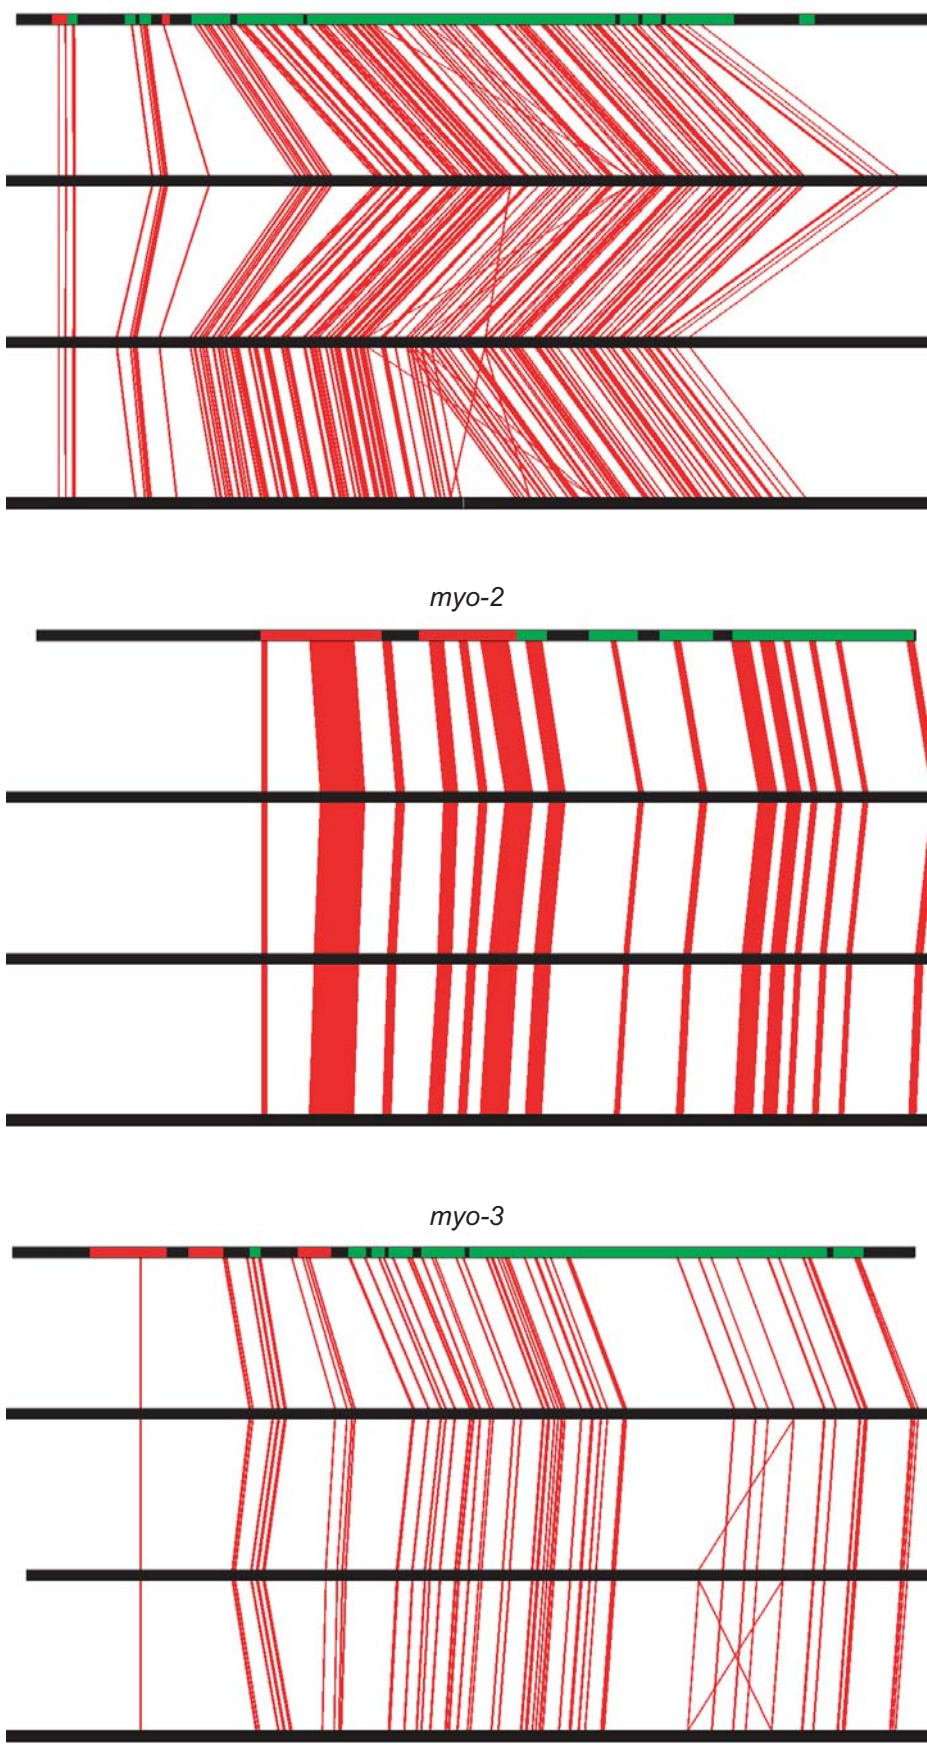





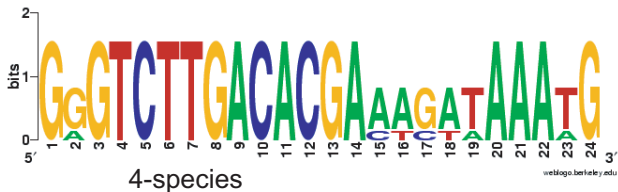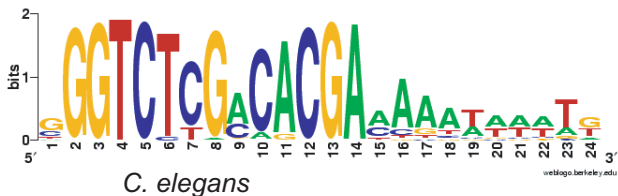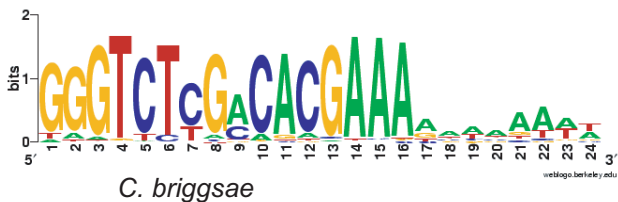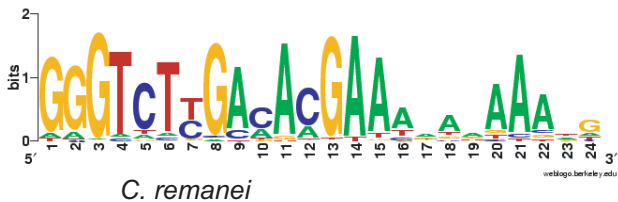

Supplement: Binder2.pdf [file Binder2.pdf]
